# Supplementary material for: Regulatory logic driving stable levels of defective proventriculus expression during terminal photoreceptor specification in flies
Source: Oxford University Press journal article supplement (doi:10.1242/dev.144030), 2017-01-01
Supplement: dev144030supp.pdf [file dev144030supp.pdf]

## Supplemental Figures

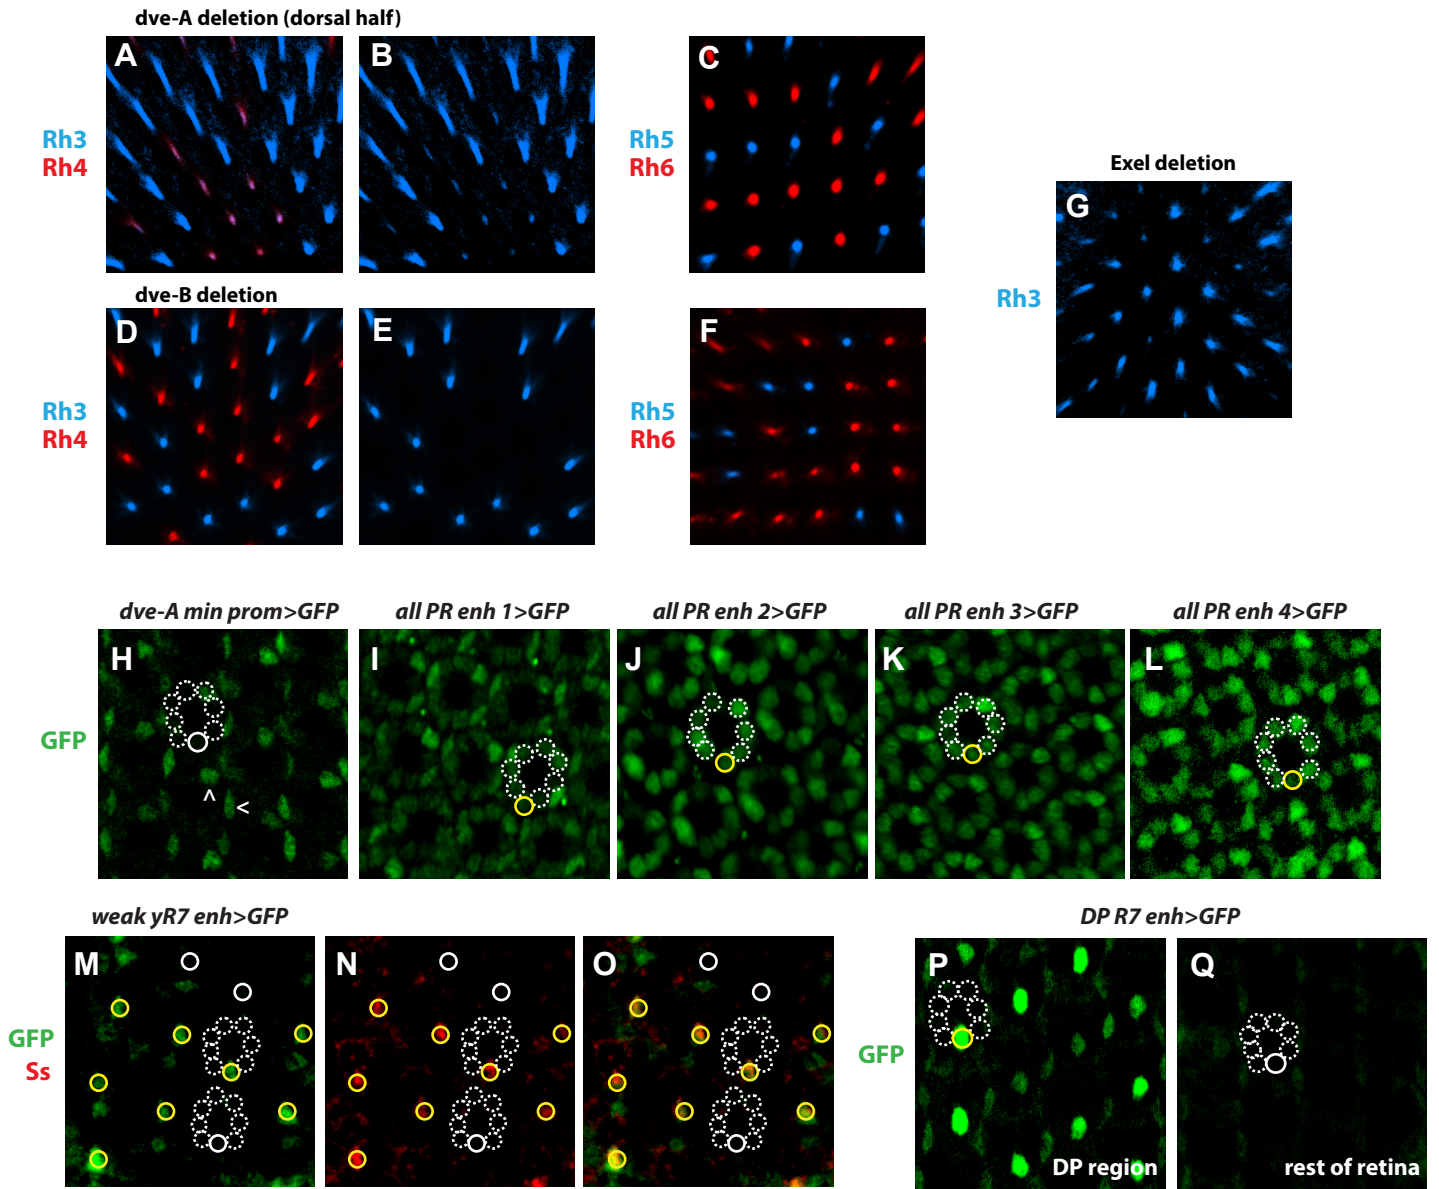

## Figure S1. *dve enh>GFP* constructs and *dve-A* and *dve-B* promoter deletions

A-C. *dve-A* promoter deletion resulted in upregulation of Rh3 in all R7s in the dorsal half of the retina. Dve targets Rh5 and Rh6 displayed wild type expression.

D-F. *dve-B* promoter deletion displayed wild type expression of Dve targets (Rh3, Rh5, and Rh6).

G. *dve<sup>exel</sup>* deletion, covering *yR7 enh* and the *dve-A* promoter, resulted in Rh3 upregulation in R7s.

H. *dve-A min prom* drove weak expression in R4s (denoted by ^) and pigment cells (denoted by <). Dashed white circles represent outer PRs and R8s; solid white circle indicates R7.

I-L. Four enhancers (*all PR enh 1-4*) drove weak GFP expression in all PRs. Dashed white circles represent PRs. Yellow circles denote GFP-expressing R7s.

M-O. *weak yR7 enh* displayed weak GFP expression in *yR7s*; *Ss* is a marker for *yR7s*. Dashed white circles represent outer PRs and R8s, solid white circles denote *pR7s*, and solid yellow circles denote *yR7s*.

P-Q. *dorsal R7 enh* drove expression in R7s in the dorsal posterior (DP) region of the retina. Dashed white circles represent PRs. Yellow circles indicate GFP-expressing R7; solid white circle indicates non-expressing R7.

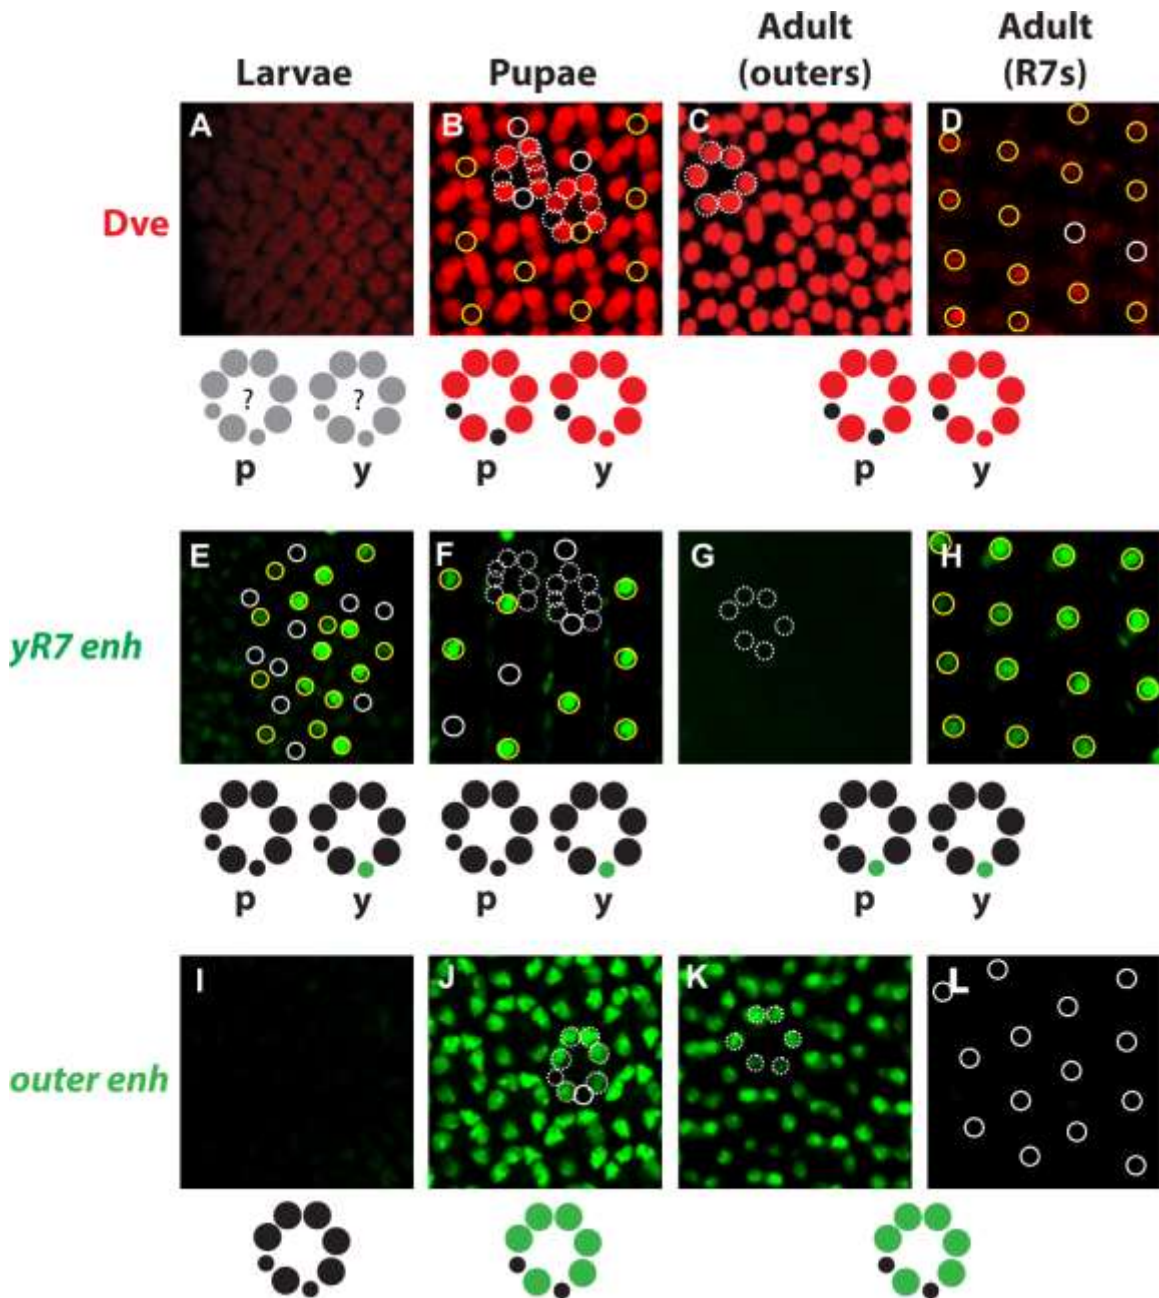

**Figure S2. Differential expression of Dve throughout development**

For A-L, in schematics, red circles indicate endogenous Dve expression, green circles indicate GFP expression, black circles indicate no expression (endogenous Dve or GFP), and gray circles indicate indeterminate expression.

For B-D, yellow circles indicate **yR7** cells. Solid white circles indicate **pR7** cells. Dashed white circles are outer PRs and R8s.

For E-H, yellow circles indicate **yR7** cells. Solid white circles indicate **pR7** cells. Dashed white circles are outer PRs and R8s.

For J-L, dashed white circles represent outer PRs; solid white circles indicate R7s.

A. Antibody staining for Dve is nonspecific in larvae.

B-D. Dve is highly expressed in outer PRs and weakly expressed in **yR7s** in pupae and adults.

E-F. **yR7 enh** is expressed in **yR7s** in larvae and pupae.

G-H. **yR7 enh** is expressed in all R7 cells in the adult but is not expressed in outer photoreceptors.

I. *outer enh* is not expressed in larvae.

J-L. *outer enh* drives expression in outer PRs in pupae and adults, but is not expressed in R7s.

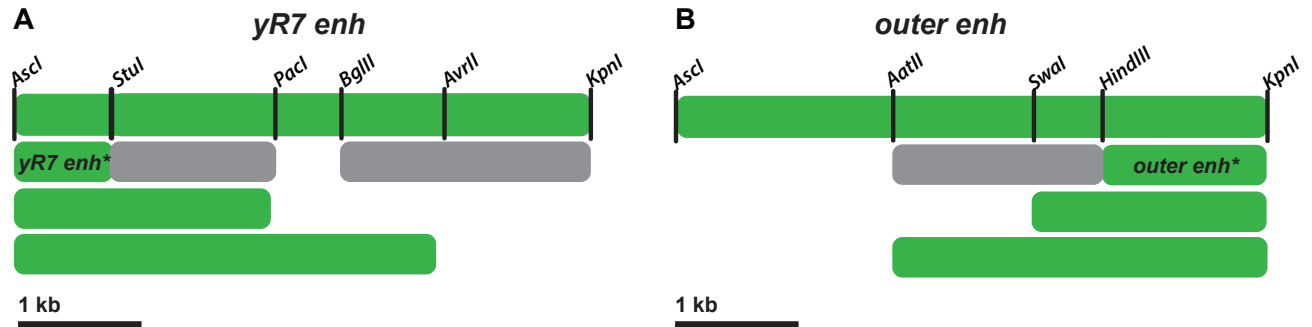

**Figure S3. Restriction enzyme sites used to generate *dve enh* truncations**

A. Schematic of the *yR7 enh* and the restriction enzyme sites used to generate the *yR7 enh\** and other truncations.

B. Schematic of the *outer enh* and the restriction enzyme sites used to generate the *outer enh\** and other truncations.

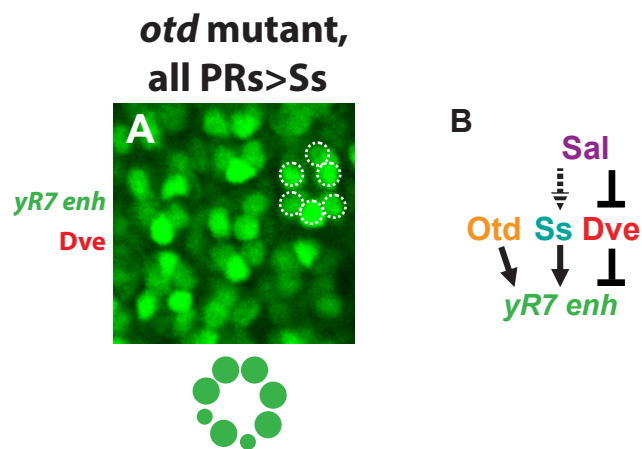

**Figure S4. Sal activates *yR7 enh* by repressing Dve**

A. In *otd* mutants, in which Dve is not expressed, ectopic Ss induces *yR7 enh* in all PRs.

B. The regulatory interactions governing *yR7 enh*. Otd and Ss activate *yR7 enh*, while Dve represses *yR7 enh*. Sal activates stochastic expression of Ss (denoted by dashed arrow) in *yR7*s and represses Dve.

## Supplementary Materials and Methods

### Generating *dve enh>GFP* constructs

3-6kb fragments (Fig. 2A) were amplified using DNA isolated from *yw*<sup>67</sup> flies and ligated into the pGEM-T easy vector. The 699 bp *dve* minimal promoter was subcloned into a pJR16 nGFPcDNA reporter vector containing a *w<sup>+</sup>* marker, generating the pGG14 vector. Other fragments of the *dve* locus were subcloned into pGG14 before microinjection into fly embryos. Constructs were then integrated into the genome via the attP/B system, and injected flies were crossed with a balancer stock with the genotype *yw*; *+/+*; *Tm2/Tm6b*. Red-eyed offspring were isolated, and transgenes were balanced over *Tm6b*. Primers and restriction enzymes used to generate each *dve* enhancer construct are shown in Table S1.

Enhancer constructs *yR7 enh>GFP* and *outer enh>GFP* were further truncated using restriction enzymes and blunt end ligation (Fig. S3A,B). Reporter vectors were microinjected into fly embryos, and transgenic lines were established using the same methods as above.

### *Drosophila* strains

Flies were raised on standard cornmeal medium and grown at room temperature (25°C). Transgenic lines used include *dve* enhancer gene constructs generated for this project, as well as the reagents in Table S2.

The GAL4-UAS system was used to ectopically express *Sal*, *Ss*, and *Dve* (Brand and Perrimon, 1993), while the FLP-FRT system was used to create *sal* and *dve* mutant phenotypes (O'Gorman et al., 1991). Shortened and complete genotypes of flies examined are found in Table S3.

Janelia and VDRC Stock Centers generated transgenic lines that express GAL4 driven by flanking non-coding or intronic regions of various genes. GAL4 lines

associated with *dve yR7* and *dve outer* enhancer elements were crossed with UAS-nlsGFP. See Table S4.

### CRISPR-generated deletions

*dve-B* promoter, *outer enh*, and *yR7 enh* deletions were generated using CRISPR. We designed four gRNAs per deletion, two flanking either side of the deletion. Forward and reverse strands of gRNAs were designed and annealed together to have BbsI restriction site overhangs. gRNAs were then cloned into the pCDF3 cloning vector. Single stranded homologous bridges were generated with 80 bp homologous regions flanking each side of the deletion. An AscI restriction cut site was incorporated into the homologous bridge to facilitate screening. For every deletion, all four gRNAs were injected into *Drosophila* embryos at 125ng/ul each for a total of 500ng, along with 100ng/ul of homologous bridge oligos. Single adult males were then crossed with balancer stocks (*yw* ; *if / cyo* ; +), and the progeny were screened for the deletion via PCR. Homologous bridges, gRNAs, and PCR screening primers are shown in Table S5.

### Otd/Dve binding site knockout

Otd/Dve binding site knockouts for *outer enh* and *yR7 enh* were generated using site-directed mutagenesis, where the K50 homeodomain consensus sites (TAATCC) were replaced with AAAAAA. Constructs were integrated into the genome and *Drosophila* strains were established using the same methods as described above.

### Electrophoretic Mobility Shift Assay

Binding assays were performed as previously described (Johnston et al., 2011; Li-Kroeger et al., 2008).

Probes tested were as follows (bold/underline indicates K50 Otd/Dve site or mutated K50 Otd/Dve site):



*yR7 enh 1* 5' –CGTGTTAGCCAAACCT**TAATCC**AGGCTAAACGAGGG- 3'  
*yR7 enh 2* 5' –AAATACGCTTATGTC**GGATTA**TCCCATAATTTATG- 3'  
*yR7 enh mutant 1* 5' –CGTGTTAGCCAAACCT**TGCGCC**AGGCTAAACGAGGG- 3'  
*yR7 enh mutant 2* 5' –AAATACGCTTATGTC**GGCGCA**TCCCATAATTTATG- 3'  
*outer enh 1* 5' –AGCAAACAACAAAA**GGATTA**AGTCCAAGACACAC- 3'  
*outer enh 2* 5' –ATACTTATTT**CATTAGGATTA**TTTTTGACTAACAT - 3'  
*outer enh 3* 5' –TCACGGCATTAAATT**TAATCC**GCTTAAAAGTTTCA - 3'  
*outer enh 4* 5' –TCACACAAGGATTCG**TAATCC**TTGCGAGGGACCCA- 3'  
*outer enh mutant 1* 5' –AGCAAACAACAAAA**GGCGCA**AGTCCAAGACACAC- 3'  
*outer enh mutant 2* 5' –ATACTTATTT**CATTAGGCGCA**TTTTTGACTAACAT- 3'  
*outer enh mutant 3* 5' –TCACGGCATTAAATT**TGCGCC**GCTTAAAAGTTTCA- 3'  
*outer enh mutant 4* 5' –TCACACAAGGATTCG**TGCGCC**TTGCGAGGGACCCA- 3'

## Antibodies

Antibodies and dilutions used were as follows: mouse anti-prospero (1:10)(DSHB), rat anti-Elav (1:50)(DSHB), sheep anti-GFP (1:500), mouse anti-Rh3 (1:100)(gift from S. Britt, University of Colorado), rabbit anti-Rh4 (1:100)(gift from C. Zuker, Columbia University), mouse anti-Rh5 (1:2000)(Tahayato et al., 2003), rabbit anti-Rh6 (1:2000)(Tahayato et al., 2003), guinea pig anti-Ss (1:200)(Gift from Y.N. Jan, University of California, San Francisco), rabbit anti-Dve (1:500)(Nakagoshi et al., 1998). All secondary antibodies were Alexa-conjugated (1:400) (Molecular Probes).

## Retina dissection and immunohistochemistry

Retinas were dissected and stained as described previously (Hsiao et al., 2012). Larvae were collected and dissected in ice cold PBS (1x), and retinas were isolated using forceps before fixing for 20 minutes in 4% formaldehyde at RT. Samples were washed three times with PBX and kept in primary antibodies diluted in PBX overnight at 4°C. After three washes with PBX, secondary antibodies diluted in PBX were added, and samples were kept at RT for at least 2 hours. After three more washes, samples were kept in PBX at room temperature overnight, before being mounted flat in Vectashield (Vector Laboratories).

To facilitate pupae collection at the desired mid-pupae stage, flies were raised at 25°C in a 12hr light/12hr dark cycle incubator. Pupae heads were dissected in ice cold PBS (1x) and eye-brain complexes were extracted via pipetting. Fixing, antibody staining and mounting procedures were consistent with those of larvae, but pupal retinas were not isolated from the brain until prior to mounting.

Adult flies were anesthetized on CO<sub>2</sub> pads before their heads were removed using forceps. Fly heads were dissected in ice cold PBS (1x), and retinas were isolated using forceps. Fixing and antibody staining procedures were consistent with those of larvae and pupae, although laminae were not removed until after fixing. Retinas were then mounted using SlowFade Gold Reagent (ThermoFisher Scientific).

For all stages of fly development, samples stained with antibodies were visualized under a Zeiss LSM 700 confocal microscope.

### **Quantification**

Fluorescence intensity of nuclear GFP expression of single retinas was quantified using the ImageJ processing program. A small region in the center of each nucleus was selected for fluorescence intensity measurement. Images were taken under subsaturating conditions and comparisons of GFP intensity were drawn between cells of the same retina. Column scatterplots were generated using Graphpad Prism.

**Table S1. *dve enh>GFP* Constructs and Primers**

| <b>Construct</b>                 | <b>Primers</b>                                                         | <b>Restriction sites</b>     |
|----------------------------------|------------------------------------------------------------------------|------------------------------|
| <i>yR7 enh</i>                   | agtcggcgcgcccacaaccatttactcctgc<br>agtcggtacccttctcccagcttcgaatg       | <i>AscI</i><br><i>KpnI</i>   |
| <i>outer enh</i>                 | agtcggcgcgccctcatcctcatccctacctac<br>agtcggtaccacaactgcctttgccttg      | <i>AscI</i><br><i>KpnI</i>   |
| <i>yR7 enh extended to right</i> | agtcggcgcgccgctagctaccgtgatcaac<br>agtcggtaccgtttagctcgattacgcttc      | <i>AscI</i><br><i>KpnI</i>   |
| <i>dve min promotor</i>          | agtcagatcttgatctggctctctggactc<br>agtcggatccgtgggaaagtgttgtaagc        | <i>BglII</i><br><i>BamHI</i> |
| <i>weak yR7 enh</i>              | agtcggcgcgcccggcagcaggtgagttgag<br>agtcggtacctacgatgacaccgataagcg      | <i>AscI</i><br><i>KpnI</i>   |
| <i>dorsal R7 enh</i>             | agtcggcgcgcccataatcacaacacgagtcgg<br>agtcggtaccgatgggtggcttaactcaatc   | <i>AscI</i><br><i>KpnI</i>   |
| <i>all PR enh 1</i>              | agtcggcgcgccgcttatctgcggtttgtgg<br>agtcggtaccctcgtctgtcccattcca        | <i>AscI</i><br><i>KpnI</i>   |
| <i>all PR enh 2</i>              | agtcggcgcgccgctagcgcatagagcatagatg<br>agtcggtaccgttgctggcaccaatacacg   | <i>AscI</i><br><i>KpnI</i>   |
| <i>all PR enh 3</i>              | agtcggcgcgccgctgctgcctacaagttgga<br>agtcggtaccgccttctgaagactagcac      | <i>AscI</i><br><i>KpnI</i>   |
| <i>all PR enh 4</i>              | agtcggcgcgcccgaactcctcgactcacac<br>agtcggtaccccaattcgtgattg            | <i>AscI</i><br><i>KpnI</i>   |
| <i>dve enh 1</i>                 | agtcggcgcgcccactgacatcaattaccgctc<br>agtcggtaccaggagaaaggagtgagttcg    | <i>AscI</i><br><i>KpnI</i>   |
| <i>dve enh 2</i>                 | agtcggcgcgccccatccccttagagagctttg<br>agtcggtacctgtatctggggaatcggatg    | <i>AscI</i><br><i>KpnI</i>   |
| <i>dve enh 3</i>                 | agtcggcgcgccgcccacaatgtcaagcatcaaag<br>agtcggtaccacttcccacagtatcatcttg | <i>AscI</i><br><i>KpnI</i>   |
| <i>dve enh 4</i>                 | agtcggcgcgcccagagctgaactgaacaatc<br>agtcggtaccctgtctctgctgctttgtga     | <i>AscI</i><br><i>KpnI</i>   |
| <i>dve enh 5</i>                 | agtcggcgcgccgcttagtgagctactgtt<br>agtcggtaccgaaggcttacgaaactaatg       | <i>AscI</i><br><i>KpnI</i>   |
| <i>dve enh 6</i>                 | agtcggcgcgcccagctcgtaagcataagca<br>agtcggtaccctgtcccgaattaccctatc      | <i>AscI</i><br><i>KpnI</i>   |
| <i>dve enh 7</i>                 | agtcggcgcgccgtggtggtggcgattcatttg<br>agtcggtaccctaccacaaaactagagcacc   | <i>AscI</i><br><i>KpnI</i>   |

**Table S2. *Drosophila* reagent descriptions**

| <b>Name</b>                            | <b>Description</b>                                                                                              | <b>Source</b>                                     |
|----------------------------------------|-----------------------------------------------------------------------------------------------------------------|---------------------------------------------------|
| <i>otd<sup>uvi</sup></i>               | hypomorphic allele, fails to produce protein product in the eye                                                 | (Vandendries et al., 1996)                        |
| <i>FRT40 sal<sup>Df(2L)32FP5</sup></i> | a deficiency that removes the <i>sal</i> gene                                                                   | (Barrio et al., 1999)                             |
| <i>FRT42d dve<sup>186</sup></i>        | Dve protein null mutant                                                                                         | (Terriente et al., 2008)                          |
| <i>FRT40 GMR-hid, cL</i>               | eye-specific enhancer driving <i>hid</i> , an activator of apoptosis                                            | Bloomington                                       |
| <i>FRT42d GMR-RFP</i>                  | eye-specific enhancer driving RFP                                                                               | Bloomington                                       |
| <i>ey-FLP</i>                          | eye-specific enhancer driving flippase                                                                          | Bloomington                                       |
| <i>ss<sup>d115.7</sup></i>             | Ss protein null mutant                                                                                          | (Duncan et al., 1998)                             |
| <i>ss<sup>Df(3R)Exel7330</sup></i>     | Deficiency covering the <i>ss</i> locus                                                                         | Bloomington                                       |
| <i>UAS-Sal</i>                         | UAS enhancer driving <i>Sal</i>                                                                                 | (Kuhnlein and Schuh, 1996), (Wernet et al., 2003) |
| <i>UAS-Dve</i>                         | UAS enhancer driving <i>Dve</i>                                                                                 | (Nakagoshi et al., 1998)                          |
| <i>UAS-Ss</i>                          | UAS enhancer driving <i>Ss</i>                                                                                  | (Duncan et al., 1998)                             |
| <i>IGMR-Gal4</i>                       | eye-specific enhancer driving <i>Gal4</i>                                                                       | Bloomington                                       |
| <i>dve<sup>Exel</sup></i>              | deletion that removes the first exon of <i>dve</i> , <i>dve-A</i> promoter, and <i>dve yR7</i> enhancer element | See footnote*                                     |
| <i>dve<sup>E181</sup></i>              | deletion allele for the <i>dve-A</i> promoter                                                                   | (Nakagawa et al., 2011)                           |
| <i>UAS-nlsGFP</i>                      | UAS driving nuclear GFP                                                                                         | Bloomington                                       |

\*We generated the *dve<sup>exel</sup>* deletion by using hsFLP-mediated recombination between two FRT sites, inserted by P-elements P(XP)d05100 and P(XP)d08355.

**Table S3. *Drosophila* shortened and complete genotypes**

| Shortened                     | Complete genotype                                                                      | Figure                     |
|-------------------------------|----------------------------------------------------------------------------------------|----------------------------|
| <i>dve enh&gt;GFP</i>         | <i>yw ; + ; dve enh&gt;GFP</i>                                                         | 2B-E, 3A, 5A, S1H-Q, S2E-L |
| all PRs>Ss                    | <i>yw ; IGMR&gt;Gal4, UAS&gt;Ss ; dve enh&gt;GFP</i>                                   | 3E, 5D                     |
| all PRs>Sal                   | <i>yw, UAS&gt;sal ; IGMR&gt;Gal4 ; dve enh&gt;GFP</i>                                  | 3G                         |
| all PRs>Dve                   | <i>yw ; IGMR&gt;Gal4 ; dve enh&gt;GFP/ UAS&gt;dve</i>                                  | 4A, 6A                     |
| <i>sal</i> mutant             | <i>yw ; sal<sup>Df(2L)32FP5</sup>FRT40 GMR&gt;hid FRT40 ; dve enh&gt;GFP/ey&gt;Flp</i> | 3F, 5C                     |
| <i>otd</i> mutant             | <i>otd<sup>uvi</sup> ; + ; dve enh&gt;GFP</i>                                          | 3B, 5B                     |
| <i>dve</i> mutant             | <i>ey&gt;FLP ; FRT42d dve<sup>186</sup>/ FRT42d GMR&gt;RFP ; dve enh&gt;GFP/ +</i>     | 4B-E, 6B-C                 |
| <i>ss</i> mutant              | <i>yw ; + ; dve enh&gt;GFP, ss<sup>BL7985def</sup>/ ss<sup>d115.7</sup></i>            | 3C                         |
| all PRs>Ss and Sal            | <i>yw, UAS&gt;sal ; IGMR&gt;GAL4, UAS&gt;ss ; dve enh&gt;GFP</i>                       | 3H                         |
| <i>otd</i> mutant, all PRs>Ss | <i>otd<sup>uvi</sup> ; IGMR&gt;GAL4, UAS&gt;ss ; dve enh&gt;GFP</i>                    | S4A                        |
| <i>dve-A del</i>              | <i>yw ; FRT42d dve<sup>186</sup>/ dve<sup>E181</sup> ; +</i>                           | S1A-C                      |

**Table S4. *Janelia* and VDRC Gal4 stock numbers**

| <b>Janelia GMR</b> |        |        |        |
|--------------------|--------|--------|--------|
| 49373              | 49927  | 48655  | 46230  |
| 45702              | 50133  | 45682  | 46238  |
| 45284              | 46241  | 50066  | 48150  |
| 41238              |        |        |        |
| <b>VDRC Stock</b>  |        |        |        |
| 020724             | 020725 | 020737 | 020739 |

**Table S5. Primers for CRISPR**

|                             |                                                                                                                                        |
|-----------------------------|----------------------------------------------------------------------------------------------------------------------------------------|
| <b><i>dve-B del</i></b>     |                                                                                                                                        |
| Homologous bridge           | ttttatggatcgcttggcattataatgaacagcggcgctcgccggctggccatgggcgcatggcgcgcccattgggagcaagttggagctgggcaagccccacatcccatccgcccactgacctaagc<br>c  |
| dveBgRNA1 F                 | gtcgtggccatgggcgcataat                                                                                                                 |
| dveBgRNA1 R                 | aaacattatgcgcccattggccagc                                                                                                              |
| dveBgRNA2 F                 | gtcgggataagtacggtgcatgg                                                                                                                |
| dveBgRNA2 R                 | aaacctatgcaccgtacttatccc                                                                                                               |
| dveBgRNA3 F                 | gtcgtcatccttccagtgccat                                                                                                                 |
| dveBgRNA3 R                 | aaacatgggcactggaaggatgac                                                                                                               |
| dveBgRNA4 F                 | gtcgggtgtctgccactgttgaac                                                                                                               |
| dveBgRNA4 R                 | aaacgtcaacagtggcagacacc                                                                                                                |
| DveBscr F                   | gctgttgggagattaagttt                                                                                                                   |
| DveBscr R                   | tgcttctgaagactagcac                                                                                                                    |
| <b><i>outer enh del</i></b> |                                                                                                                                        |
| Homologous bridge           | gctgcctgggcgtccttttctgggcacttgatagaatttgacaaattgaaaatccttttggcgcgccgaagcctacttaagtcccttgaaatccttgagatttttgcactggtcaagcaatgataa         |
| outergRNA1 F                | gtcggacaaccgctcgccacaaa                                                                                                                |
| outergRNA1 R                | aaactttgtggcgagcggttgtcc                                                                                                               |
| outergRNA2 F                | gtcgttcaagagtccaggcgacc                                                                                                                |
| outergRNA2 R                | aaacggtcgctggactcttgaac                                                                                                                |
| outergRNA3 F                | gtcgaattaagcaatagtctta                                                                                                                 |
| outergRNA3 R                | aaactaagactattgcttaattc                                                                                                                |
| outergRNA4 F                | gtcggacttaagtaggcttcca                                                                                                                 |
| outergRNA4 R                | aaactgggaagcctacttaagtcc                                                                                                               |
| outer-scr F                 | ccagtgattatgtatggttc                                                                                                                   |
| outer-scr R                 | gagtgatttgggtatttagg                                                                                                                   |
| <b><i>yR7 enh del</i></b>   |                                                                                                                                        |
| Homologous bridge           | acttgctccccgtccgtcgatcgattcaaattaccagcgatttattggcgatcgccagccggcgccg<br>ccgctatggcaatgcaaacagggtgaggggtgaattactgtcctagacaactttgcagtcagc |
| yR7gRNA1 F                  | gtcgttgatcacggtagctaggc                                                                                                                |
| yR7gRNA1 R                  | aaacgcctagctaccgtgatcaac                                                                                                               |
| yR7gRNA2 F                  | gtcgtgttcgataacgctggtc                                                                                                                 |
| yR7gRNA2 R                  | aaacgaccagcgttatgcaaacac                                                                                                               |
| yR7gRNA3 F                  | gtcgtttagctcgattacgcttc                                                                                                                |
| yR7gRNA3 R                  | aaacgaagcgtaatcgagctaaac                                                                                                               |
| yR7gRNA4 F                  | gtcgtttgcatgcatagctac                                                                                                                  |
| yR7gRNA4 R                  | aaacgtagctatggcaatgcaaac                                                                                                               |
| yR7-scr F                   | gatggctaattggcgagagga                                                                                                                  |
| yR7-scr R                   | gcaatcttggcactcccgtt                                                                                                                   |
